# Supplementary material
Source: PubMed Central journal article supplement (PMC8122068)
Supplement: NIHMS1686455-supplement-1686455_Supp_Tab1.pdf [file NIHMS1686455-supplement-1686455_Supp_Tab1.pdf]

**Supplemental Information Table 1: ccRCC Patient Characteristics**

Patients 170-248 were used for TIF analysis, 295-345 were used for pS6 analysis; N/R= not reported

| Number in dataset | Patient ID | Histo | Grade | Age | Sex | Race/Ethnicity | Size (cm) | Mechanism of Attainment     |
|-------------------|------------|-------|-------|-----|-----|----------------|-----------|-----------------------------|
| 1                 | 170        | ccRCC | G3    | 66  | F   | White          | N/R       | Primary Nephrectomy at VUMC |
| 2                 | 192        | ccRCC | G3    | 65  | M   | Black          | 5.4       | Primary Nephrectomy at VUMC |
| 6                 | 213        | ccRCC | G4    | 59  | M   | White          | 10        | Primary Nephrectomy at VUMC |
| 9                 | 218        | ccRCC | G3    | 56  | M   | Black          | 6         | Primary Nephrectomy at VUMC |
| 10                | 219        | ccRCC | G1    | 33  | F   | White          | 5.6       | Primary Nephrectomy at VUMC |
| 11                | 220        | ccRCC | G3    | 44  | M   | White          | 9         | Primary Nephrectomy at VUMC |
| 12                | 225        | ccRCC | G3    | 79  | F   | White          | 7         | Primary Nephrectomy at VUMC |
| 14                | 227        | ccRCC | G3    | 62  | M   | White          | 13        | Primary Nephrectomy at VUMC |
| 15                | 228        | ccRCC | G3    | 67  | M   | Hispanic       | 8.5       | Primary Nephrectomy at VUMC |
| 16                | 229        | ccRCC | G2    | 74  | F   | White          | 5         | Primary Nephrectomy at VUMC |
| 17                | 231        | ccRCC | G2    | 62  | M   | White          | 3.5       | Primary Nephrectomy at VUMC |
| 18                | 234        | ccRCC | G4    | 79  | F   | White          | 3.5       | Primary Nephrectomy at VUMC |
| 19                | 235        | ccRCC | G2    | 45  | M   | White          | 12        | Primary Nephrectomy at VUMC |
| 20                | 247        | ccRCC | G3    | 38  | F   | White          | 6         | Primary Nephrectomy at VUMC |
| 21                | 248        | ccRCC | G2    | 66  | F   | White          | 7.6       | Primary Nephrectomy at VUMC |
| 1                 | 295        | ccRCC | G1    | 65  | F   | White          | 4         | Primary Nephrectomy at VUMC |
| 2                 | 323        | ccRCC | G4    | 84  | M   | White          | 8         | Primary Nephrectomy at VUMC |
| 3                 | 333        | ccRCC | G3    | 43  | M   | White          | 9.7       | Primary Nephrectomy at VUMC |
| 4                 | 345        | ccRCC | G2    | 45  | M   | White          | 14        | Primary Nephrectomy at VUMC |
